# Supplementary material for: Stable ligand-free stellated polyhedral gold nanoparticles for sensitive plasmonic detection
Source: Royal Society of Chemistry journal article supplement (doi:10.1039/c5nr08788k), 2016-01-01
Supplement: c5nr08788k1.pdf [file c5nr08788k1.pdf]

## Electronic Supplementary Information

# Stable ligand-free stellated polyhedral gold nanoparticles for sensitive plasmonic detection

Rachel Keunen, Danielle Macoretta, Nicole Cathcart and Vladimir Kitaev

## Experimental

### *Reagents*

Tetrachloroauric acid (99%), hydrogen peroxide (30-32 wt.% in water, 99.999% trace metal basis, with potassium stannate inhibitor), sodium hydroxide (99.99%), potassium iodide (99%), arginine (98-101% TLC), potassium bromide (99%), hydrochloric acid (37%, semiconductor grade), L-cysteine, 97%, ampicillin sodium salt (95%) and ascorbic acid (99.9%) were supplied by Aldrich and used as received. High-purity deionized water ( $>18.3 \text{ M}\Omega\cdot\text{cm}$ ) was produced using Millipore A10 Milli-Q.

### *Synthesis of AuStNPs*

In a typical preparation of stellated gold NPs, 4.33 mL of deionized water, 0.500 mL of 0.005 M  $\text{HAuCl}_4$ , and 0.067 mL of 10.4 M hydrogen peroxide are combined in a 20 mL vial. The reaction vial was stirred at ca. 700 rpm using a 12.7 mm by 3.2 mm magnetic stir bar. Immediately after mixing first reagents, 0.350 mL of 0.1 M NaOH was added to this mixture to increase the pH of the system. The addition of NaOH triggers the reduction of the gold precursor by the hydrogen peroxide leading to the immediate formation of blue dispersion of AuStNPs (Fig. S1); the

reaction development is visualized in Fig. S2. To complete AuStNP formation the reaction was continued stirring for 40-60 min. More details on specific sample preparation conditions are summarized in Table S1.

### ***Seeded synthesis of AuStNPs***

First, 1.31 mL (1.875  $\mu\text{mol}$  of gold) of previously synthesized AuStNPs were centrifuged for 15 min at 3000 rpm followed by decanting the supernatant and redispersing the pellet in 0.10 mL of  $\text{H}_2\text{O}$ . The total amount of gold used was kept the same as for the non-seeded AuStNP synthesis (2.50  $\mu\text{mol}$  of gold). The reaction vial was continuously stirred at ca. 700 rpm using a 12.7 mm by 3.2 mm magnetic stir bar. Reagents were combined in the following order: 4.4 mL of deionized water, 0.375 mL of 0.005 M  $\text{HAuCl}_4$ , 0.40 mL of concentrated seed particles (ca. 1.875  $\mu\text{mol}$  of gold), 0.040 mL of 10.4 M  $\text{H}_2\text{O}_2$ , and finally 0.350 mL of 0.1 M NaOH. After the addition of NaOH, the solution turned blue almost immediately (Fig. S1) and the stirring was continued for 40-60 min to complete the synthesis.

### ***Synthesis of AuStNPs with nucleation by ascorbic acid***

To prepare AuStNPs nucleated with ascorbic acid, first 0.350 mL of 0.1 M NaOH and 0.050 mL of 0.01 M ascorbic acid were combined in a 20 mL vial. In another 20 mL vial, 4.31 mL of deionized water, 0.500 mL of 0.005 M  $\text{HAuCl}_4$ , and 0.040 mL of 10.4 M hydrogen peroxide were mixed together at ca. 700 rpm. Adding at once 0.400 mL of the NaOH and ascorbic/ascorbate mixture to the gold precursor with hydrogen peroxide triggers the reduction of gold and formation of AuStNPs. The solution turned blue immediately and was allowed to stir for 40-60 min to complete the synthesis. Note that it is crucial to use freshly prepared NaOH solution (not older than 48 h), otherwise smaller AuStNPs with the less defined stellation are more likely to form.

### ***Synthesis of AuStNPs with iodide***

The preparation of AuStNPs in the presence of iodide followed the same procedure as with the typical synthesis with one exception; different amounts of potassium iodide (varied from 0 to 0.007 mM total iodide concentration) were added directly following the addition of  $\text{HAuCl}_4$  and prior to the addition of  $\text{H}_2\text{O}_2$  and  $\text{NaOH}$ .

### ***Synthesis of AuStNPs with arginine***

Arginine was tested in the AuStNP synthesis in three different manners. Firstly, it was added similarly to KI after the addition of the  $\text{HAuCl}_4$  and prior to the addition of the  $\text{H}_2\text{O}_2$  reducing agent. Secondly, it was added following the addition of the  $\text{NaOH}$  and triggering the reduction by  $\text{H}_2\text{O}_2$ . Finally, it was combined with ascorbic acid and  $\text{NaOH}$  prior to addition to the reaction vial similarly to the conditions described above for AuStNP synthesis with ascorbic acid. The total concentration of arginine varied from 0.0025 to 0.49 mM (see Table S1).

### ***Characterization***

Electron microscopy (EM), both transmission (TEM) and scanning (SEM), was performed using a Hitachi S-5200. Nanoparticle dispersions were deposited and dried on a carbon-coated Formvar grid (EMS Corp.). The operating voltage was 30.0 kV. UV-vis spectra were recorded with either an Ocean Optics QE65000 fiber-optic spectrophotometer or a Cary 50Bio UV-vis spectrophotometer. Malvern Nano ZS Zetasizer was used for zeta potential measurements.

**SPR measurements** were performed with OpenSPR instrument by Nicoya Lifesciences. Optical cells with the path lengths of 1 and 0.5 cm were used to hold 1-2 ml of AuStNP solutions. AuStNP concentration range varied from as prepared (0.23 to 0.85 mM gold) to diluted 2-4 times with the absorbance values at LSPR maxima ranging from 0.3 to 1.1.

**Table S1.** Summary of representative synthetic conditions for AuStNP samples shown in electron microscopy images including information on particle size and surface plasmon resonance maxima,  $\lambda_{\text{LSPR}}$ .

| HAuCl <sub>4</sub><br>(mM)<br>(1) | H <sub>2</sub> O <sub>2</sub><br>(mM)<br>(2) | NaOH<br>(mM)<br>(3) | Arginine<br>( $\mu$ M)<br>(4) | Ascorbic<br>Acid<br>(mM)<br>(5) | Addition<br>Order    | Stir<br>Rate<br>(rpm) | $\lambda_{\text{LSPR}}$<br>(nm) | Average<br>size<br>(nm) | Corre-<br>sponding<br>Figure Image |
|-----------------------------------|----------------------------------------------|---------------------|-------------------------------|---------------------------------|----------------------|-----------------------|---------------------------------|-------------------------|------------------------------------|
| 0.51                              | 84                                           | 4.0                 | ---                           | ---                             | 1-2-3                | 200                   | 748                             | 150                     | Fig. 2A,D                          |
| 0.85                              | 13.6                                         | 11.9                | ---                           | ---                             | 1-2-3                | swirlin               | 667                             | 127                     | Fig. 2B                            |
| 0.26                              | 28.7                                         | 6.3                 | ---                           | ---                             | 1-2-3                | 700                   | 750                             | 201                     | Fig. 2C, S5A                       |
| 0.45                              | 66                                           | 6.3                 | ---                           | ---                             | 1-2-3                | 700                   | 773                             | 149                     | Fig. 2E                            |
| 0.46                              | 86                                           | 6.5                 | ---                           | ---                             | 1-2-3                | 700                   | 753                             | 125                     | Fig. 2F                            |
| 0.43                              | 79                                           | 6.7                 | ---                           | 0.07                            | 1-2-3,5 <sup>B</sup> | 500                   | 548                             | 40                      | Fig. 3A1                           |
| 0.48                              | 79                                           | 6.7                 | ---                           | 0.17                            | 1-2-3,5 <sup>B</sup> | 700                   | 585                             | 65                      | Fig. 3A2                           |
| 0.48                              | 79                                           | 6.7                 | ---                           | 0.10                            | 1-2-3,5 <sup>B</sup> | 700                   | 622                             | 100                     | Fig. 3A3                           |
| 0.48                              | 79                                           | 6.7                 | ---                           | 0.10                            | 1-2-3,5 <sup>B</sup> | 700                   | 643                             | 115                     | Fig. 3A4                           |
| 0.48                              | 133                                          | 6.7                 | ---                           | ---                             | 2-3-1                | 700                   | 698                             | 150                     | Fig. 3A5                           |
| 0.48                              | 133                                          | 6.7                 | ---                           | ---                             | 2-3-1                | 700                   | 753                             | 155                     | Fig. 3A6                           |
| 0.48                              | 79                                           | 6.7                 | ---                           | ---                             | 1-2-3                | 300                   | 780                             | 137                     | Fig. 3A7, S6A                      |
| 0.48                              | 79                                           | 3.8                 | ---                           | ---                             | 1-2-3                | 700                   | 876                             | 212                     | Fig. 3A8                           |
| 0.48                              | 79                                           | 4.8                 | ---                           | ---                             | 1-2-3                | 400                   | 750                             | 132                     | Fig. S3A                           |
| 0.48                              | 79                                           | 6.7                 | 2.9                           | 0.095                           | 1-2-                 | 700                   | 596                             | 89                      | Fig. S3B                           |
| 0.48                              | 133                                          | 2.9                 | 9.5                           | ---                             | 1-2-3-4              | 700                   | 687                             | 63                      | Fig. S3C                           |
| 0.82                              | 19.7                                         | 11.5                | ---                           | ---                             | 1-2-3                | ~700                  | 621                             | 102                     | Fig. S3D                           |
| 0.48                              | 133                                          | 6.7                 | 9.5                           | ---                             | 1-2-3-4              | 700                   | 643                             | 86                      | Fig. S3E                           |
| 0.45                              | 66                                           | 6.3                 | ---                           | ---                             | 1-2-3                | 700                   | 685                             | 109                     | Fig. S3F                           |
| 0.48                              | 133                                          | 6.7                 | 480                           | ---                             | 1-4-2-3              | 700                   | 554                             | 27                      | Fig. S3G                           |
| 0.23                              | 130                                          | 8.4                 | ---                           | ---                             | 1-2-3                | 700                   | 664                             | 118                     | Fig. S3H                           |
| 0.48                              | 133                                          | 6.7                 | 9.5                           | ---                             | 1-4-2-3              | 700                   | 620                             | 30                      | Fig S5B                            |
| 0.48 <sup>C</sup>                 | 79                                           | 6.7                 | ---                           | ---                             | 1-2-3-1 <sup>C</sup> | 700                   | 649                             | 134                     | Fig. S5C                           |
| 0.48 <sup>D</sup>                 | 79                                           | 6.7                 | ---                           | ---                             | 1-3-2                | 700                   | 840                             | 164                     | Fig. S5D                           |
| 0.48                              | 79                                           | 4.8                 | ---                           | ---                             | 1-2-3                | 700                   | 562                             | 49                      | Fig. S6B                           |
| 0.48                              | 79                                           | 6.7                 | ---                           | 0.095                           | 1-2-3,5 <sup>B</sup> | 700                   | 634                             | 88                      | Fig. S6C,D                         |

\*Concentrations are total concentration in the reaction.

<sup>A</sup> NaOH, arginine, and ascorbic acid combined prior to addition to sample vial. Added simultaneously to gold precursor and hydrogen peroxide combined.

<sup>B</sup> NaOH and ascorbic acid combined prior to addition to sample vial.



<sup>c</sup> Centrifuged previously formed AuStNPs for 15 min at 3000 rpm and redispersed the pellet in 400  $\mu$ L of  $H_2O$ . Used 100  $\mu$ L of redispersed AuStNP sample and 375  $\mu$ L  $HAuCl_4$  0.005 M solution. Redispersed stars were the first component added following by  $HAuCl_4$  that was added dropwise over a one minute interval.

<sup>d</sup> Centrifuged previously formed AuStNPs for 15 min at 3000 rpm and redispersed the pellet in 400  $\mu$ L of  $H_2O$ . Used 100  $\mu$ L of redispersed AuStNP sample and 375  $\mu$ L  $HAuCl_4$  0.005 M solution.  $HAuCl_4$  was added first followed immediately by the redispersed AuStNP solution.

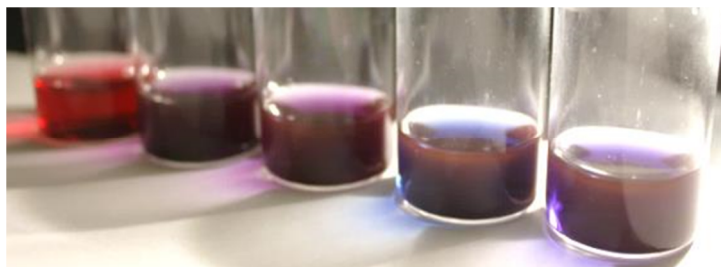

**Figure S1.** Photographs of a series of AuStNPs representative of the diversity of sizes and LSPR; the samples are shown as prepared in original reaction vials.

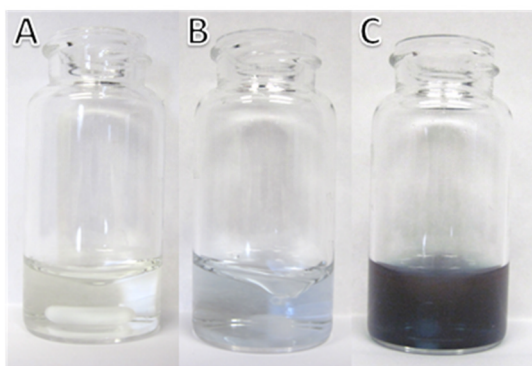

**Figure S2.** Photographs of the development stages of AuStNPs after the addition of both NaOH and  $H_2O_2$ . **A)** After  $H_2O_2$  addition; **B)** ca. 1 s after NaOH addition; **C)** Within 30 s after NaOH addition.

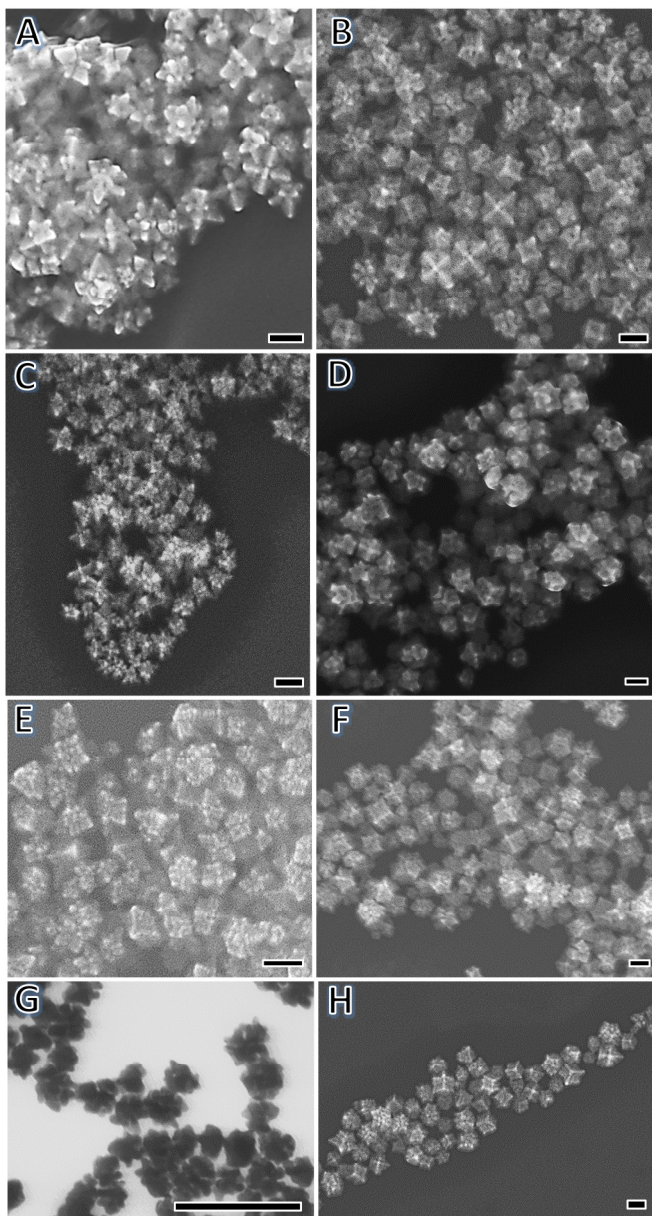

**Figure S3.** EM images of representative AuStNPs corresponding to reaction conditions itemized in **Table S1**. All scale bars are 100 nm.

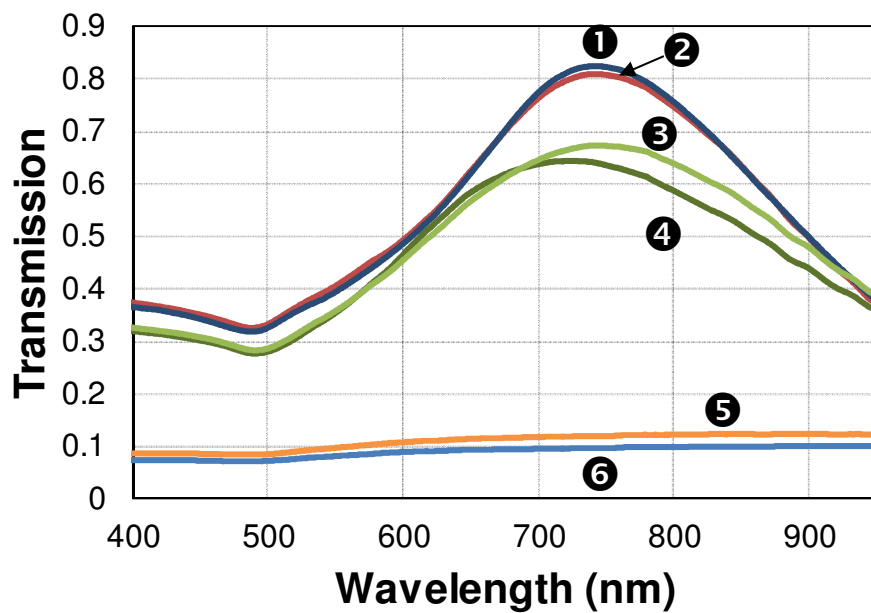

**Figure S4.** UV-vis spectra illustrating the effect of the order of reagent addition on AuStNP development. The order of reagents is as the following: **1**  $\text{H}_2\text{O}_2$ ,  $\text{NaOH}$ ,  $\text{HAuCl}_4$ ; **2**  $\text{NaOH}$ ,  $\text{H}_2\text{O}_2$ ,  $\text{HAuCl}_4$ ; **3**  $\text{HAuCl}_4$ ,  $\text{H}_2\text{O}_2$ ,  $\text{NaOH}$ ; **4**  $\text{H}_2\text{O}_2$ ,  $\text{HAuCl}_4$ ,  $\text{NaOH}$ ; **5**  $\text{NaOH}$ ,  $\text{HAuCl}_4$ ,  $\text{H}_2\text{O}_2$ ; **6**  $\text{HAuCl}_4$ ,  $\text{NaOH}$ ,  $\text{H}_2\text{O}_2$ . The final concentrations of the 3 reagents were 6.7 mM for  $\text{NaOH}$ , 133 mM for  $\text{H}_2\text{O}_2$ , and 0.28 mM for Au.

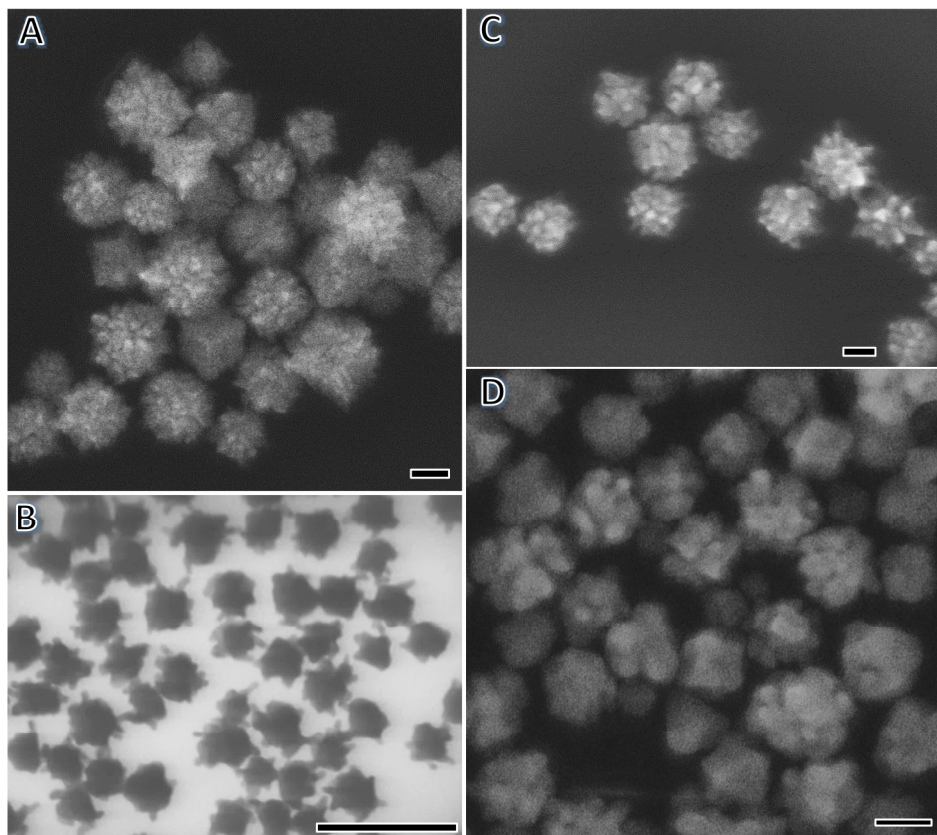

**Figure S5.** Electron microscopy (EM) images of **A)** AuStNPs prepared with lower gold precursor concentration (0.26 mM); **B)** Au stars synthesized using arginine (9.5 μM total concentration); **C)** and **D)** AuStNPs synthesized using concentrated previously synthesized AuStNP seeds (see Experimental). All scale bars are 100 nm.

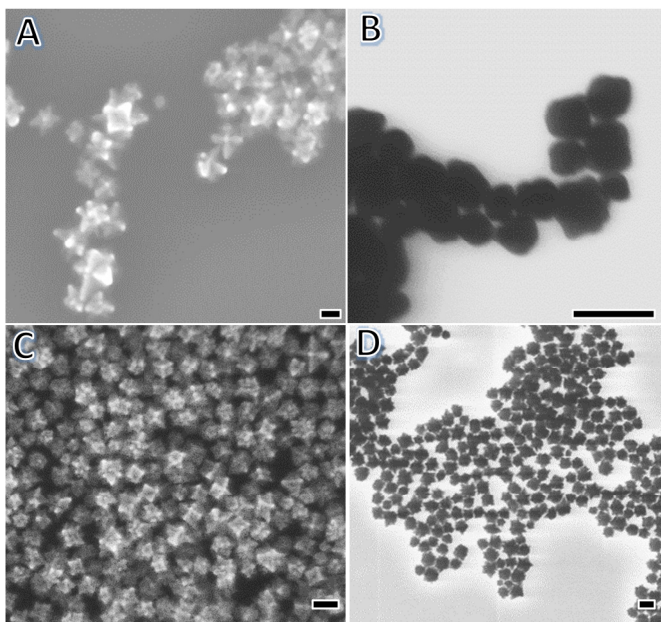

**Figure S6.** EM images illustrating the effects of nucleation by ascorbic acid on AuStNP size dispersity: **A)** no ascorbic acid, **B)** 0.15  $\mu\text{M}$ , **C)** and **D)** 95 nM. All scale bars are 100 nm.

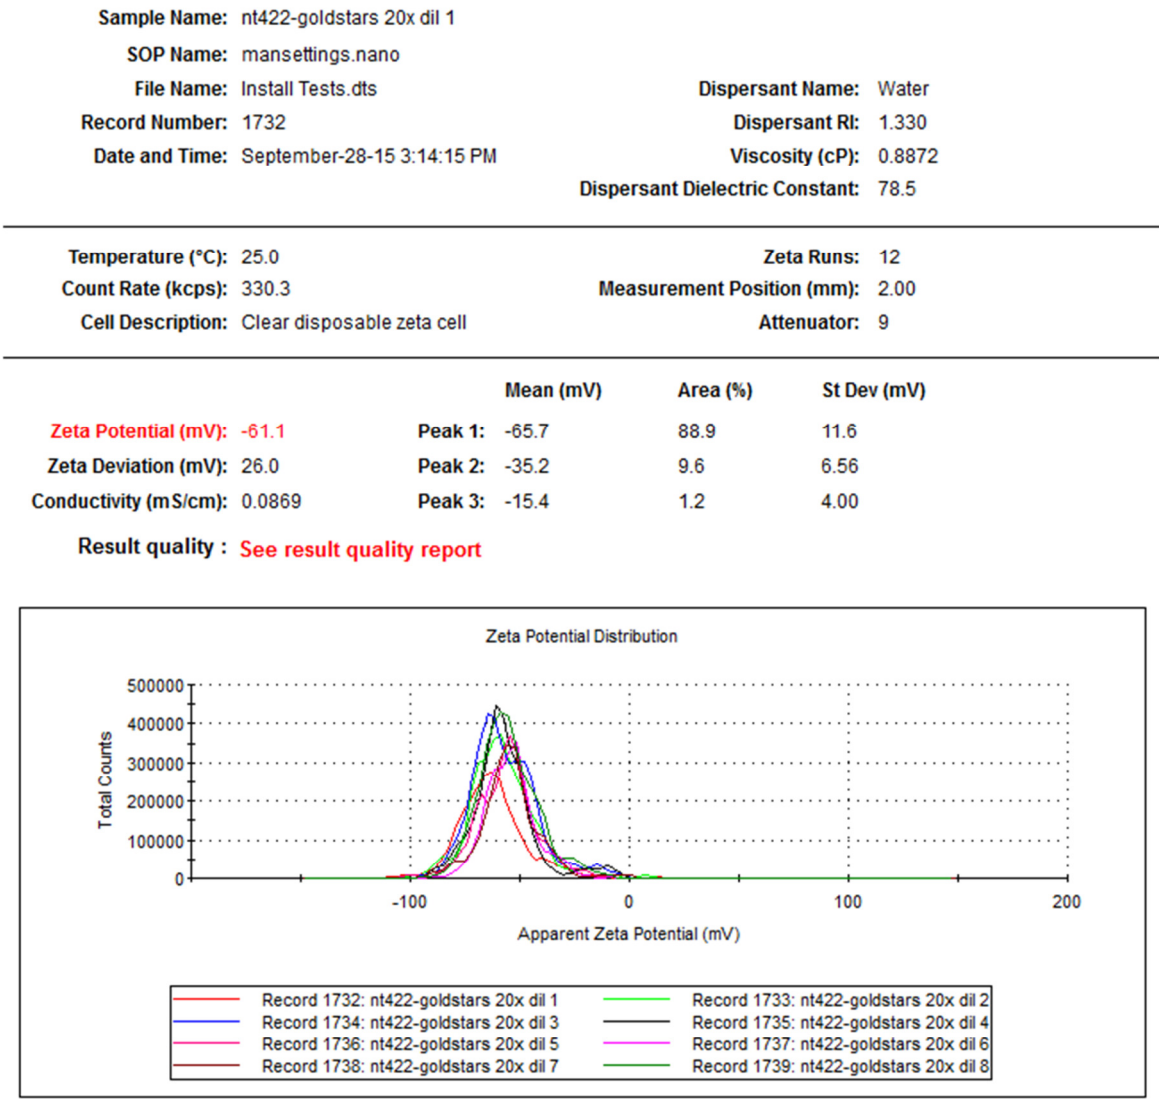

**Figure S7.** Zeta potential measurements (8 independent runs) for AuStNP sample diluted 20 times.

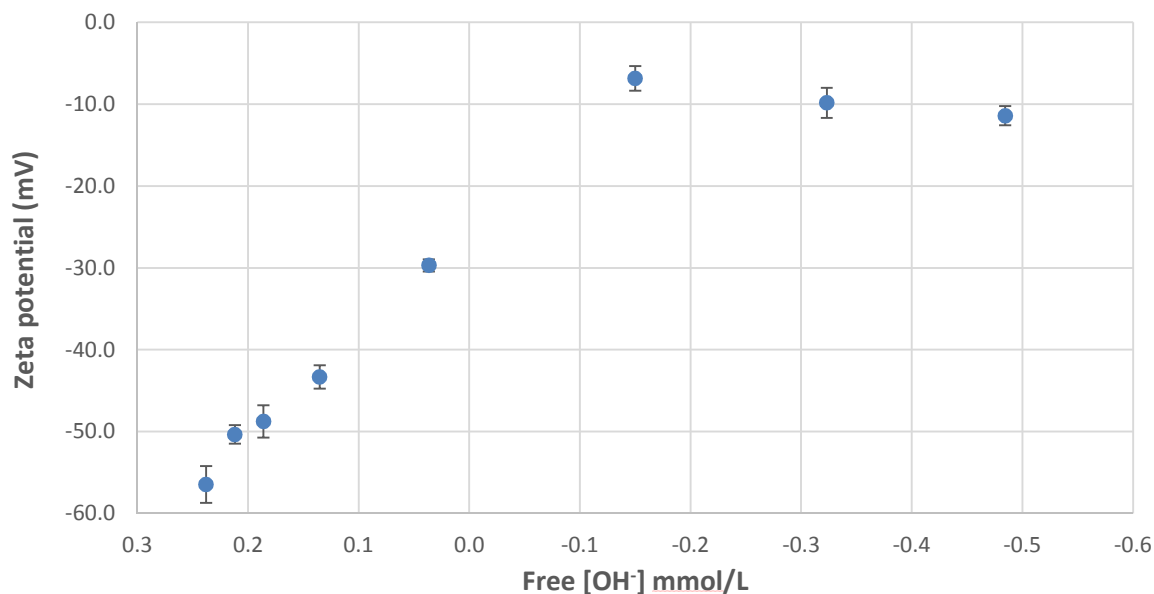

**Figure S8.** Zeta potential titration measurements for AuStNP sample diluted 20 times from original 0.43 mM Au concentration of as prepared sample. HCl is added to neutralize NaOH. Zeta potential is shown as a function of calculated concentration of free OH<sup>-</sup> ions. Negative values represent HCl excess. For further details see **Table S2**.

**Table S2.** Zetasizer data for AuStNP titration with HCl.

| Sample              | Free [OH <sup>-</sup> ] (mmol/L) | ζ average (mV) | σ <sub>ζ</sub> (mV) | # Runs |
|---------------------|----------------------------------|----------------|---------------------|--------|
| NT422- 20 x diluted | 0.238                            | -56.5          | 2.3                 | 8      |
| +5 μL 0.005 M HCl   | 0.212                            | -50.4          | 1.1                 | 8      |
| +10 μL 0.005 M HCl  | 0.186                            | -48.8          | 2.0                 | 8      |
| +20 μL 0.005 M HCl  | 0.135                            | -43.3          | 1.4                 | 8      |
| +40 μL 0.005 M HCl  | 0.037                            | -29.7          | 0.7                 | 8      |
| +80 μL 0.005 M HCl  | -0.150                           | -6.8           | 1.5                 | 8      |
| +120 μL 0.005 M HCl | -0.323                           | -9.8           | 1.8                 | 80     |
| +160 μL 0.005 M HCl | -0.484                           | -11.4          | 1.2                 | 40     |



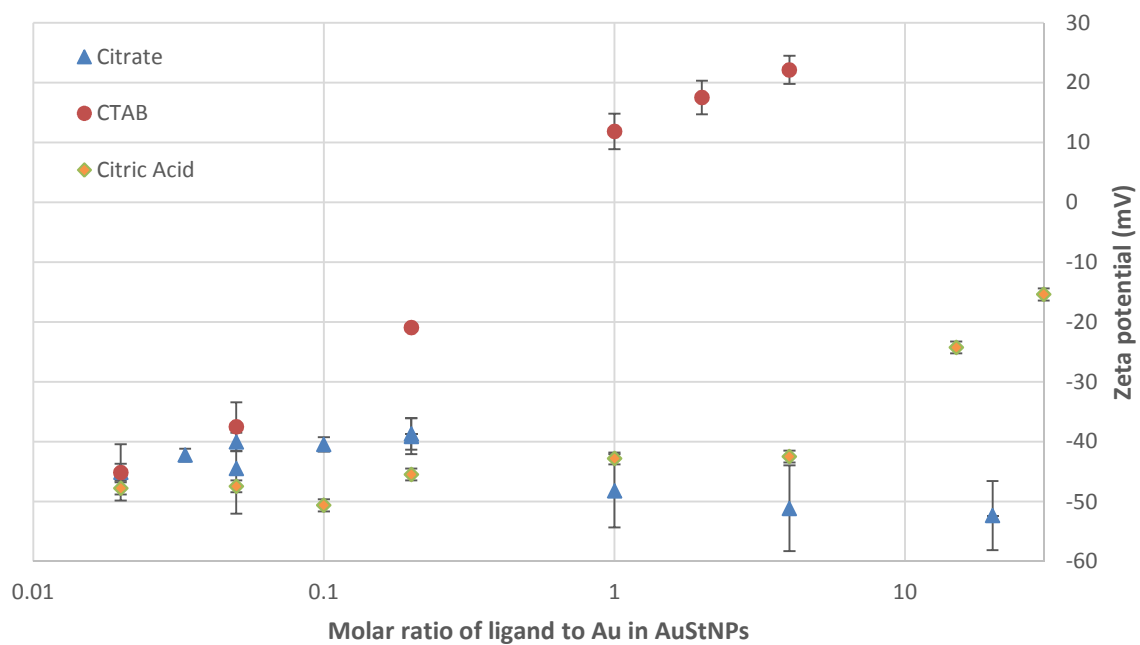

**Figure S9.** Zeta potential measurements for AuStNP (diluted 20 times from original Au concentration of 0.43 mM) upon addition of CTAB (red circles), citrate (blue triangles) and citric acid (orange diamonds).



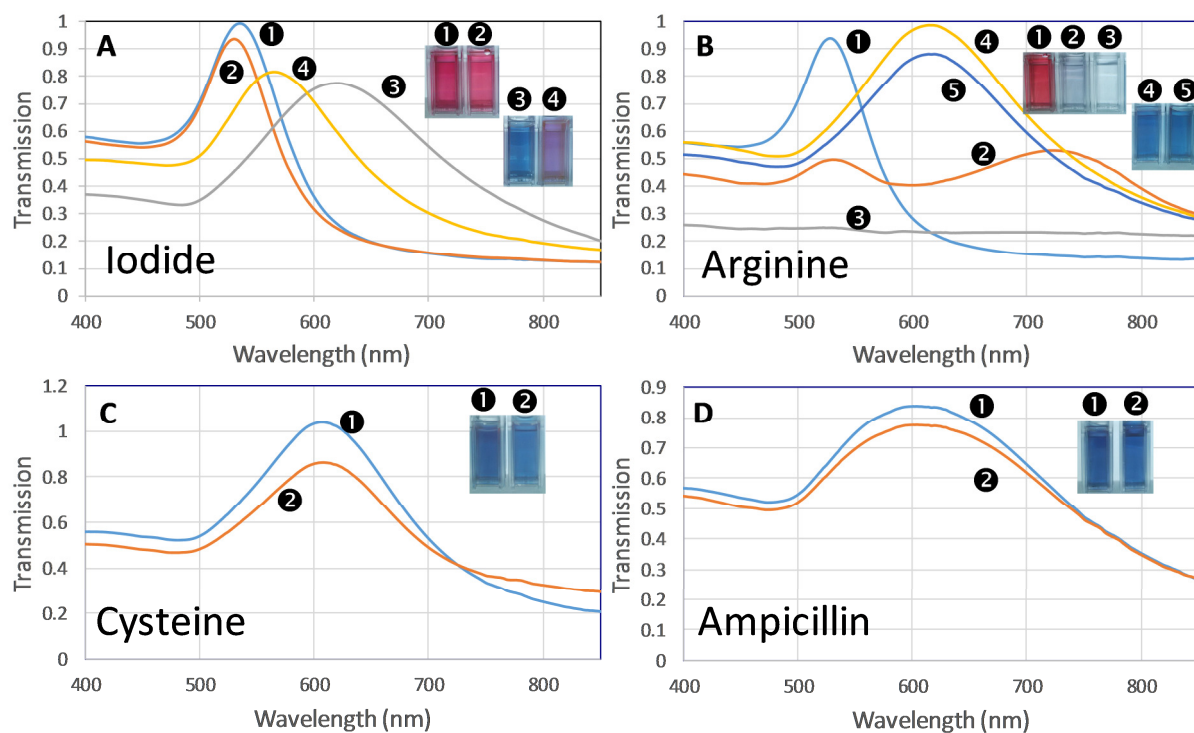

**Figure S10.** UV-vis spectra with photograph insets of control AuStNP samples and AuStNP samples exposed to different reagents. **A)** KI – 1) smaller AuStNP control sample, 2)  $10^{-3}$  M KI, 3) larger AuStNP control sample, and 4)  $10^{-5}$  M KI. **B)** Arginine -1) smaller AuStNP control sample, 2)  $10^{-2}$  M, 3)  $10^{-1}$  M, 4) larger AuStNP control sample, and 5)  $10^{-1}$  M. **C)** Cysteine – 1) larger AuStNP control sample, 2)  $10^{-1}$  M cysteine. **D)** Ampicillin – 1) larger AuStNP control sample, and 2)  $10^{-2}$  M ampicillin.
